# Supplementary material
Source: PubMed Central journal article supplement (PMC9709035)
Supplement: 41423_2022_934_MOESM1_ESM.pdf [file 41423_2022_934_MOESM1_ESM.pdf]

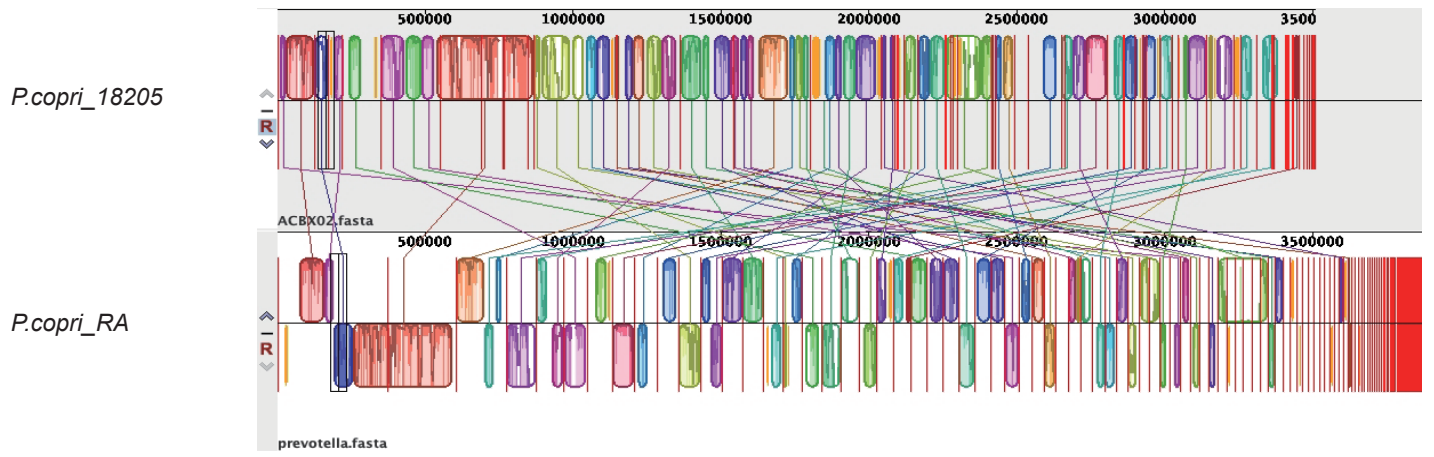

**Supplementary Figure 1 Alignment of the genomes of the *P. copri* strains using Mauve software.**

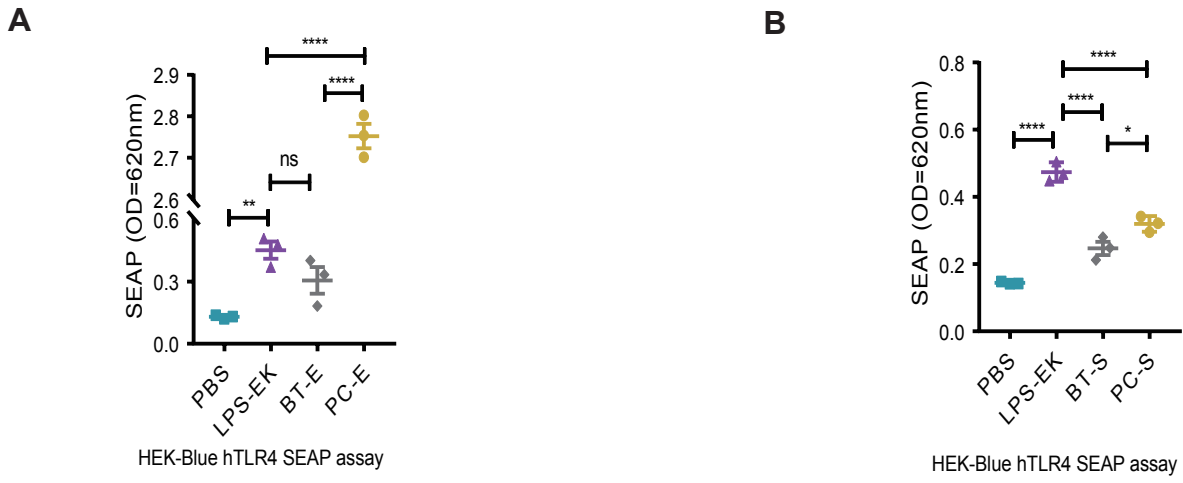

**Supplementary Figure 2 Activation of the TLR4 pathway by extracts and supernatants of *P. copri* RA and *B. thetaiotaomicron*.**

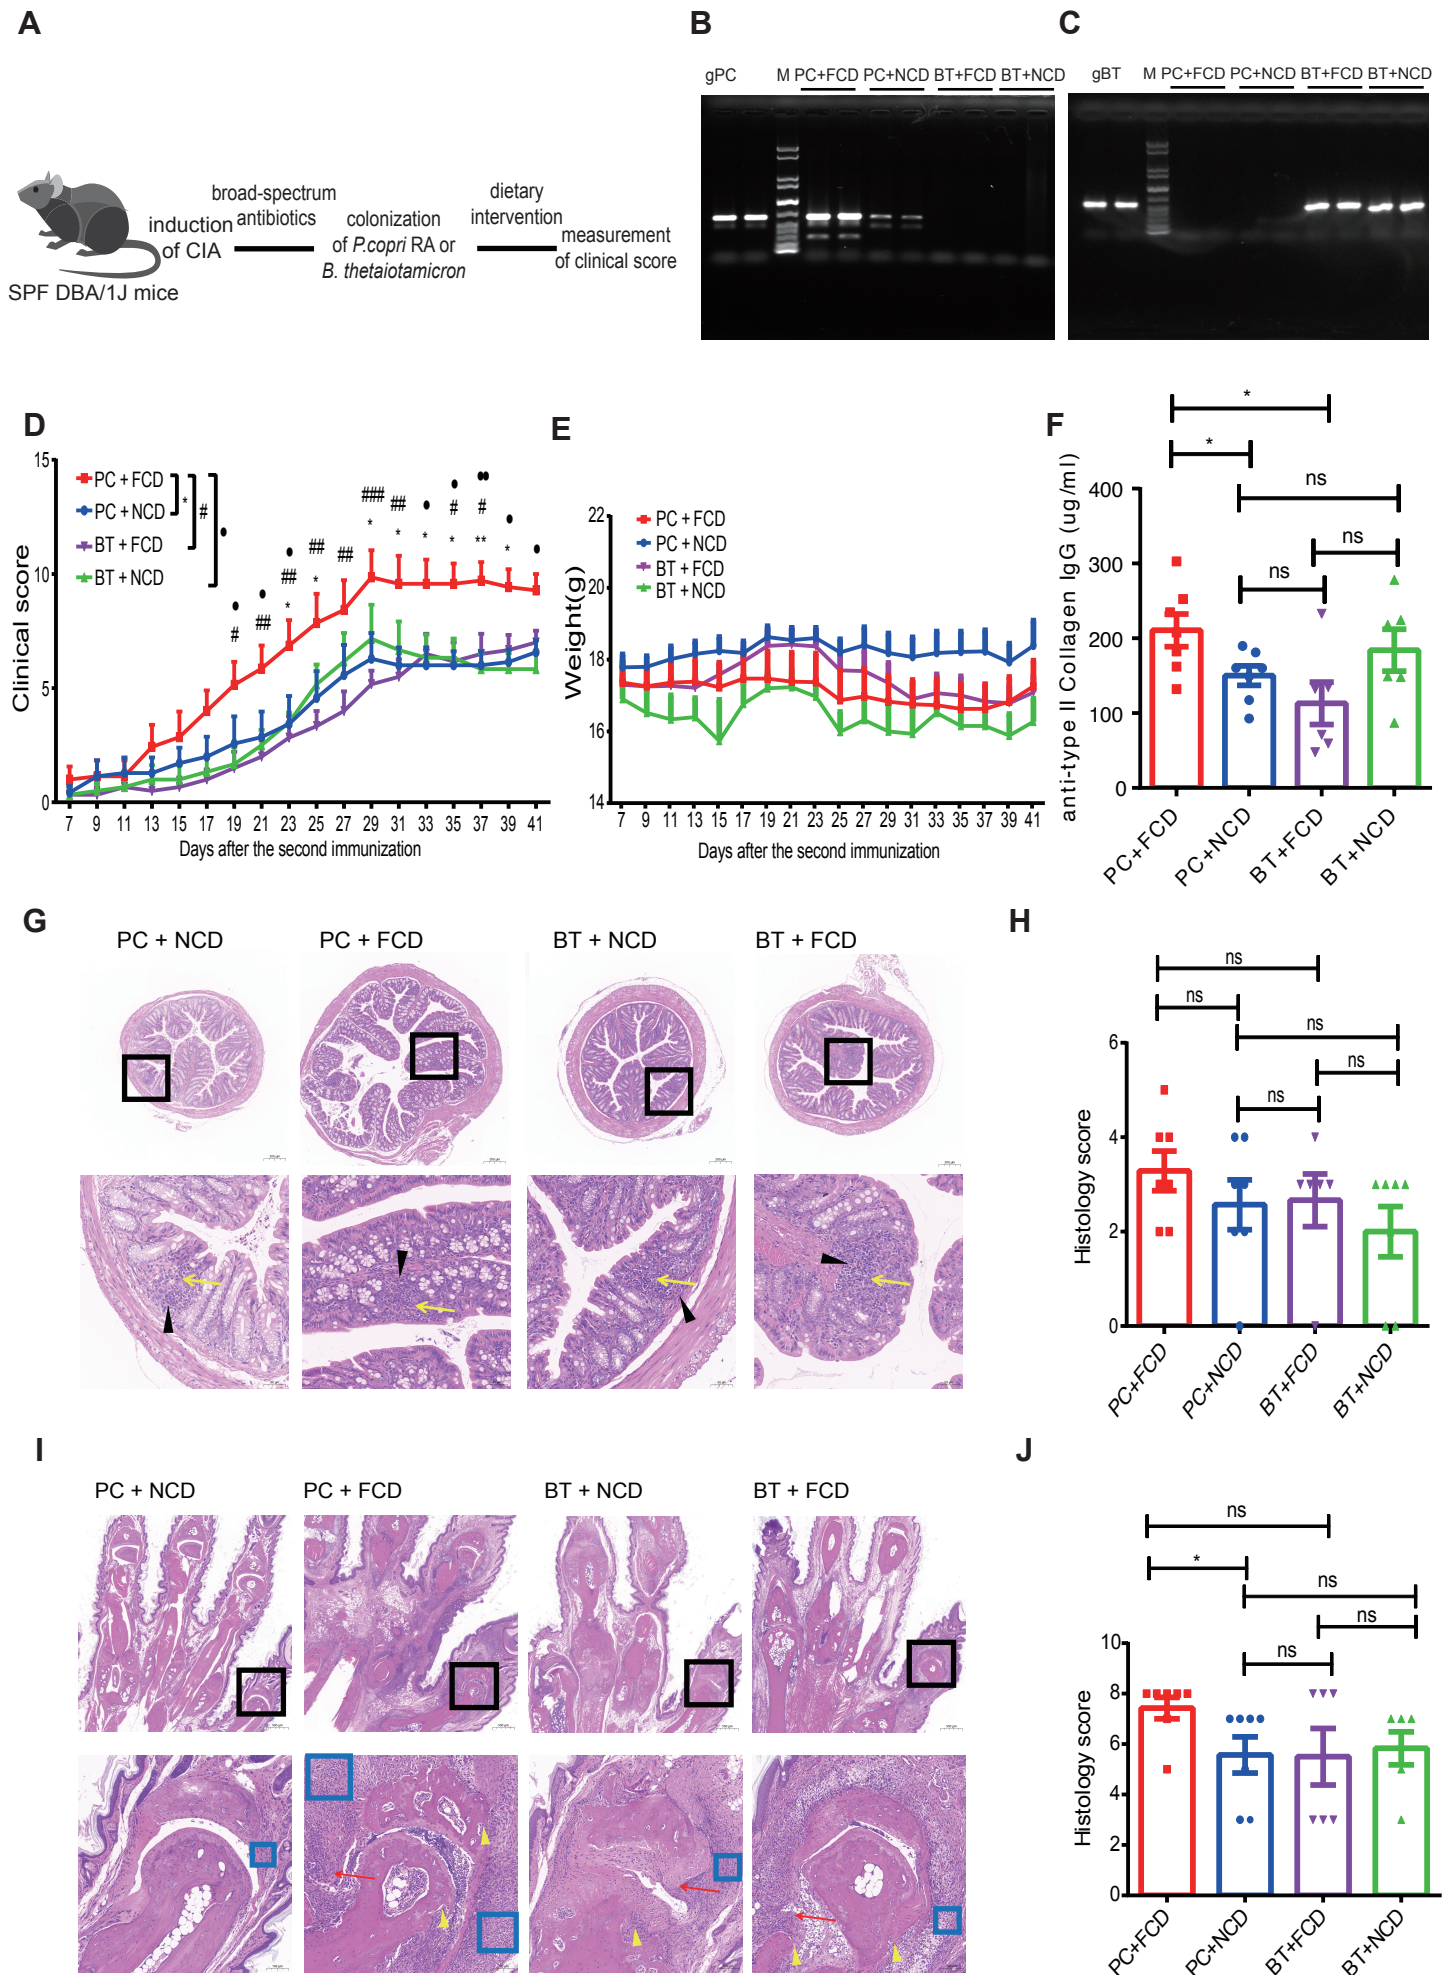

Supplementary Figure 3 Effects of fiber-diet synergizing with PC/BT colonization on arthritis.
